# Supplementary material
Source: PubMed Central journal article supplement (PMC9363484)
Supplement: 41467_2022_32320_MOESM1_ESM.pdf [file 41467_2022_32320_MOESM1_ESM.pdf]

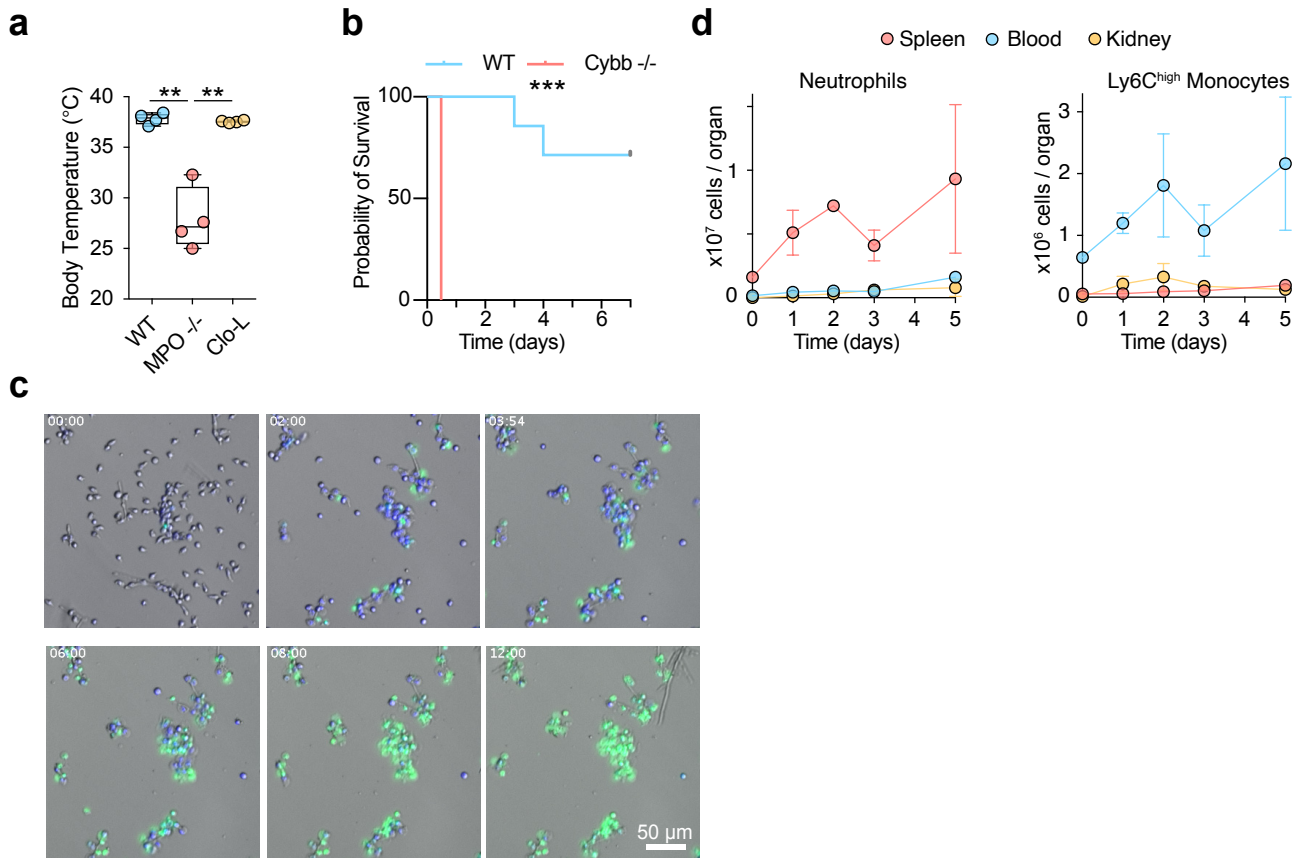

**Supplementary Figure 1. Myeloperoxidase and the NADPH oxidase control fungal growth.** **a** Body temperature of WT or MPO-deficient mice, or WT mice pre-treated with clodronate liposomes (Clo-L), infected intravenously with  $1 \times 10^5$  WT *C. albicans*, 12 hrs post-infection (n=4 mice per group). **b** Survival curves of WT and *Cybb*-deficient animals infected with  $1 \times 10^5$  WT *C. albicans* (WT n=7 and *Cybb*<sup>-/-</sup> n=6 mice). Representative of 2 independent experiments. **c** Timelapse microscopy images of *C. albicans* hyphae cultured with murine WT bone marrow-derived neutrophils in the presence of Hoechst (blue) and Sytox Green (green). Images were obtained every 2 min intervals for 12 hrs. Images from 0, 2, 4, 6, 8, 12 hrs are shown (n=4 hyphae particles examined over 12 hours). Representative data from 3 independent experiments. **d** Total number of neutrophils in the spleen (red), blood (blue) and kidneys (yellow) of WT mice infected intravenously with  $1 \times 10^5$  WT *C. albicans* at the indicated days post-infection, analysed by flow cytometry (n=3 mice / group and 2 experimental repeats). Statistical analysis by unpaired two-sided Mann-Whitney t-test (a) and Mantel-Cox log rank survival analysis (b) (\* p<0.05, \*\* p<0.01, \*\*\* p<0.001, \*\*\*\* p<0.0001).

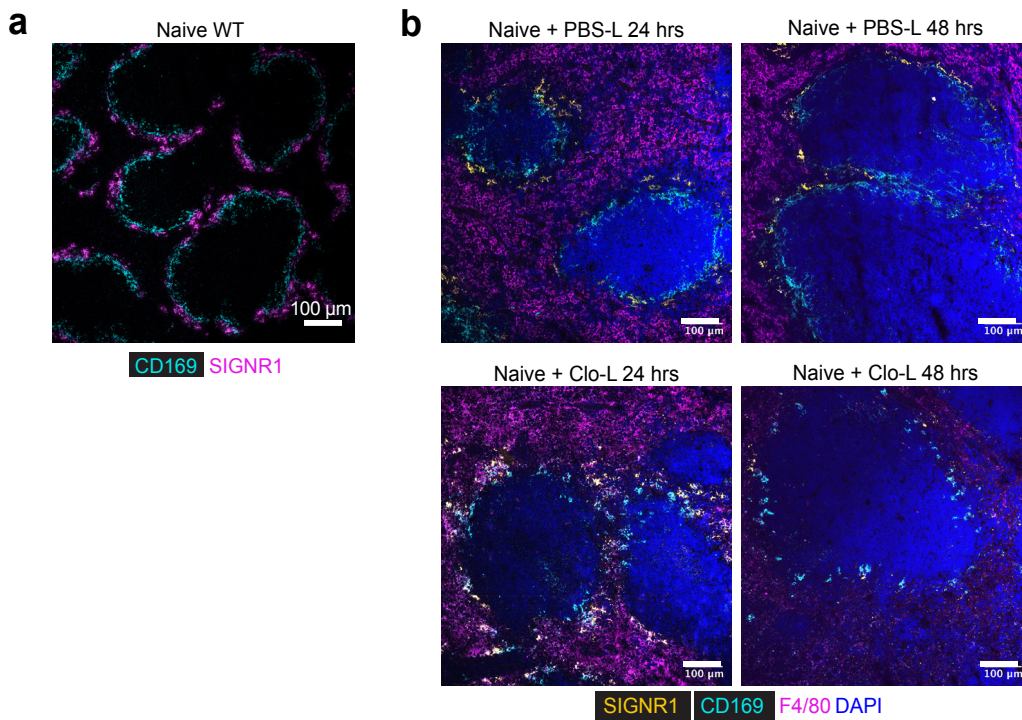

**Supplementary Figure 2. Sensitivity of splenic macrophages to clodronate liposomes.** Representative immunofluorescence confocal micrographs from: **a** the spleen of a naïve WT mouse, stained for CD169 and SIGNR1. Scale bars: 100  $\mu\text{m}$  (n=3 naïve mice analysed individually in 2 independent experiments) and **b** spleens from WT mice treated with PBS (PBS-L) or clodronate (Clo-L) liposomes for 24 hrs or 48 hrs, stained for CD169, SIGNR1, F4/80 and DAPI. Data from 2 independent experiments with 4 mice per group. Scale bars: 100  $\mu\text{m}$ .

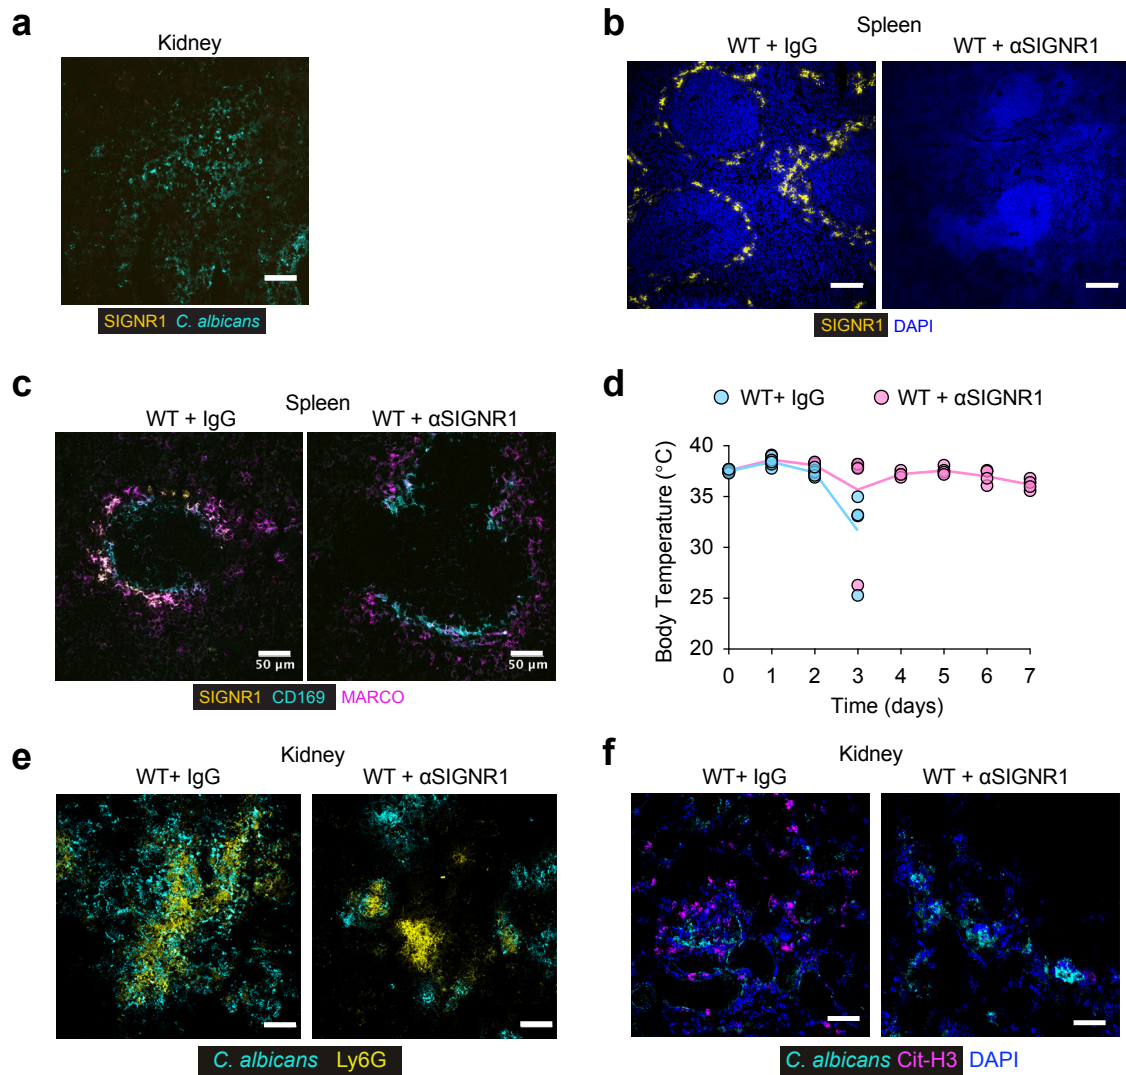

**Supplementary Figure 3. Impact of anti-SIGNR1 treatment on immune populations and responses.**

**a** Representative immunofluorescence confocal micrograph from the kidneys of symptomatic WT mice infected intravenously with  $5 \times 10^5$  WT *C. albicans* 3 days post-infection, stained for SIGNR1 and *C. albicans* ( $n=3$  mice analysed individually and 2 experimental replicates). Scale bars: 50  $\mu\text{m}$ . **b** Immunofluorescence confocal micrographs of spleens from naive WT mice treated with control or anti-SIGNR1 antibodies for 72 hrs and stained for DAPI and SIGNR1 ( $n=3$  per group and 2 independent experiments). Scale bars: 50  $\mu\text{m}$ . **c** Spleens from *C. albicans* infected mice, pre-treated with control or anti-SIGNR1 antibodies, harvested 72 hrs post infection and stained for SIGNR1, MARCO, CD169 and DAPI ( $n=4$  mice analysed individually in 2 independent experiments). Scale bars: 50  $\mu\text{m}$ . **d** Body temperatures of WT mice pre-treated with either control antibody (blue) or an anti-SIGNR1 antibody (magenta) infected intravenously with  $5 \times 10^5$  WT *C. albicans*. **e** Micrographs of kidneys from WT mice pre-treated with either control or anti-SIGNR1 antibodies, 72 hrs after intravenous infection with  $5 \times 10^5$  WT *C. albicans*, stained for *C. albicans* and Ly6G. 3 independent experiments with 3 mice analysed individually. Scale bars: 50  $\mu\text{m}$ . **f** Micrographs of kidneys from (e) stained for cit-H3, *C. albicans* and DAPI. Scale bars: 50  $\mu\text{m}$ .

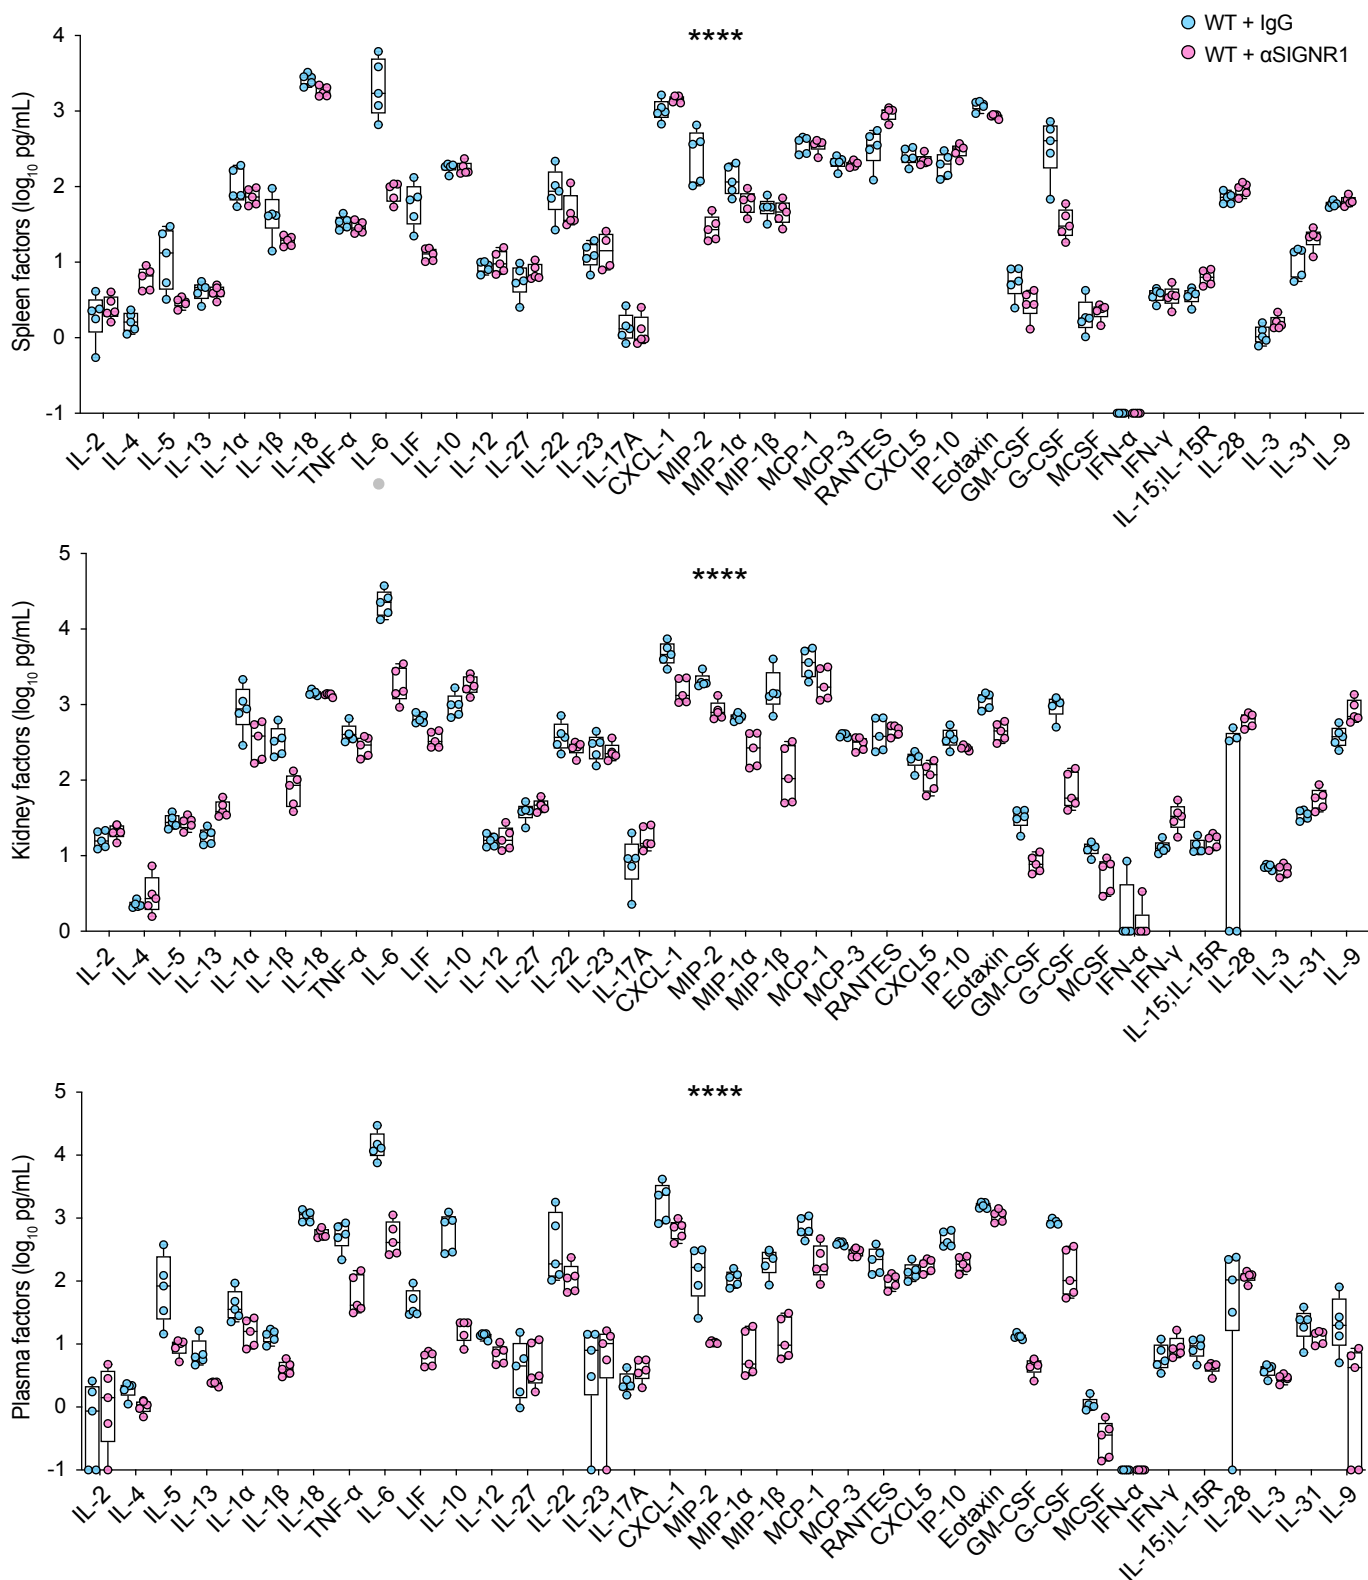

**Supplementary Figure 4. SIGNR1 promotes systemic inflammation.** Multiplex assay measurements of cytokines and chemokines in the spleens (top), kidneys (middle) and plasma (bottom) of WT mice pre-treated with either control (blue) or anti-SIGNR1 antibodies (magenta), infected intravenously with  $5 \times 10^5$  WT *C. albicans*, 3 days post infection (n=5 mice per group). Statistical analysis by two-way Anova (ns >0.05, \* p<0.05, \*\* p<0.01, \*\*\* p<0.001, \*\*\*\* p<0.0001).

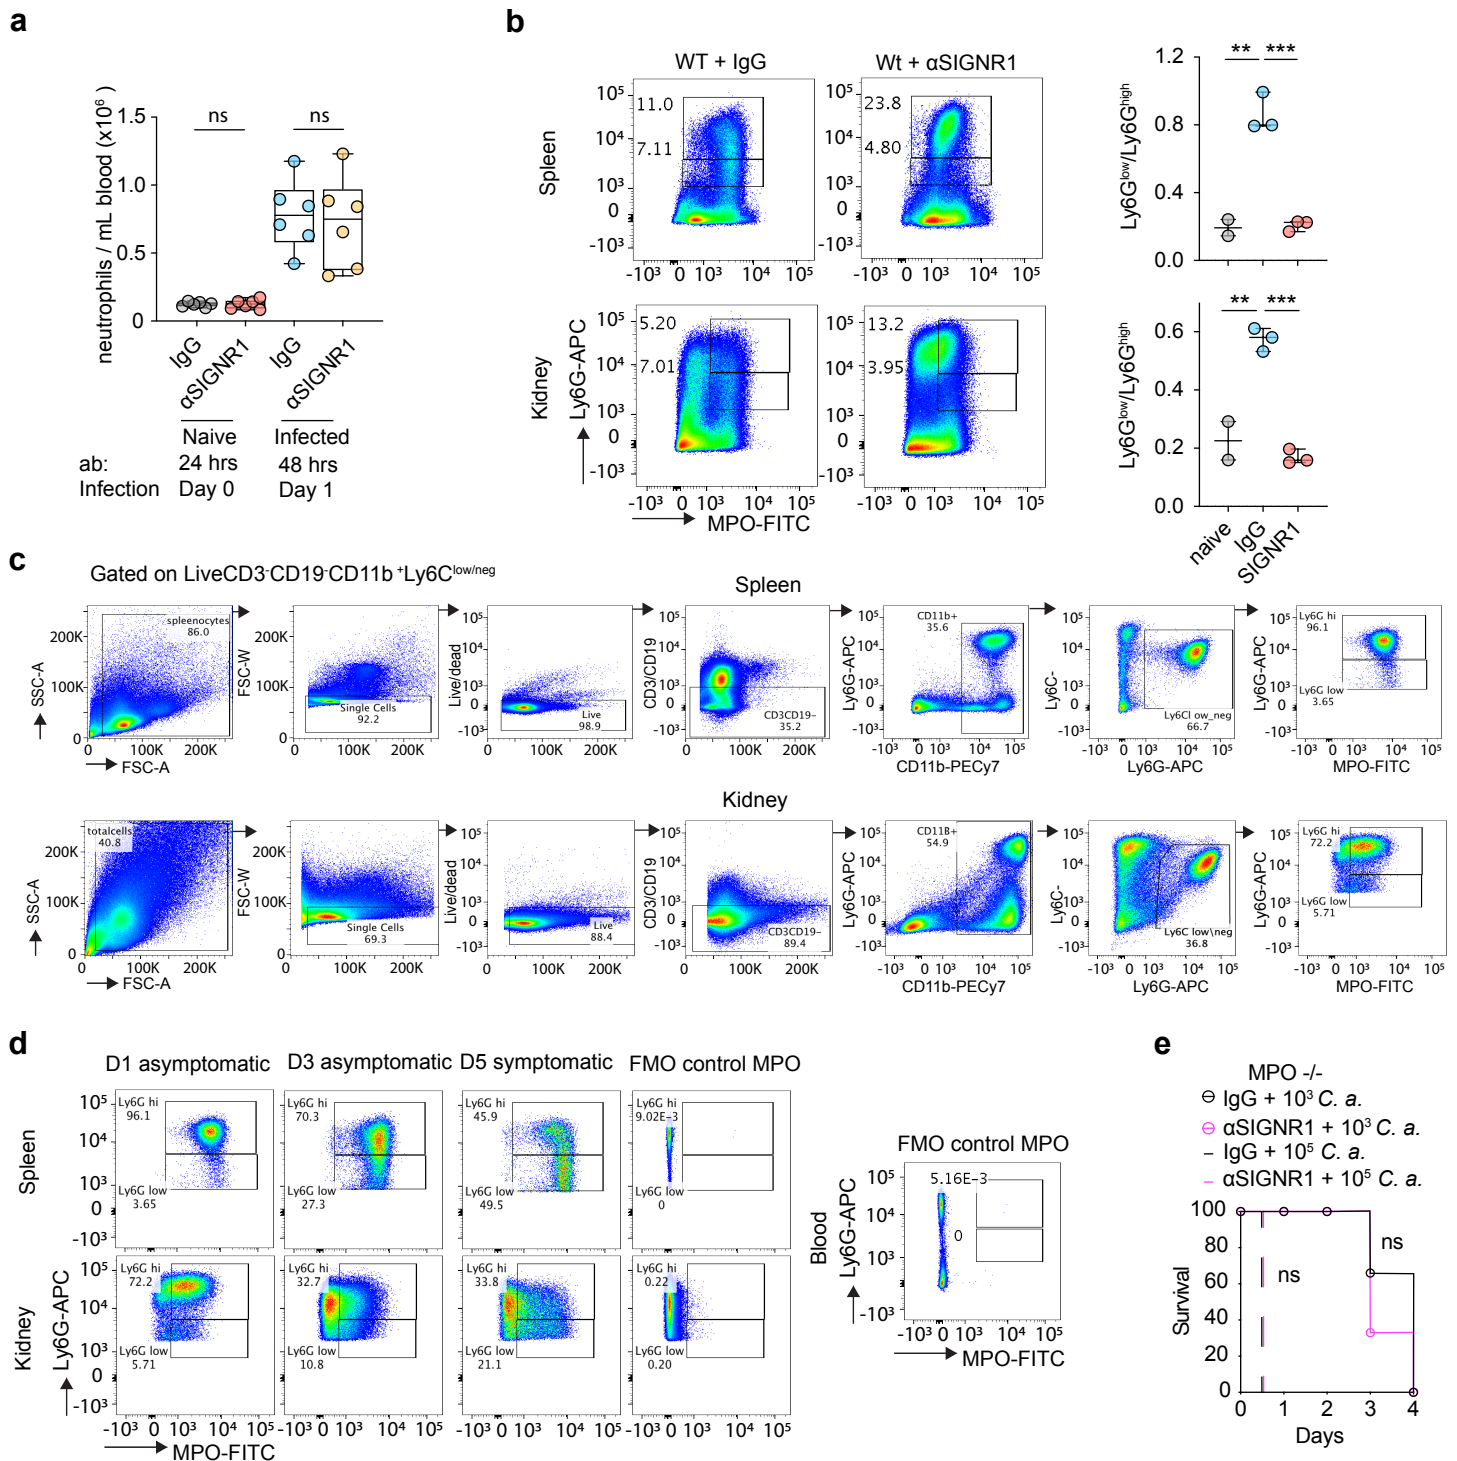

**Supplementary Figure 5. SIGNR1 regulates peripheral neutrophil population maturity.** **a-b** Analysis of samples from WT mice pre-treated with either control or anti-SIGNR1 antibodies and infected intravenously with  $5 \times 10^5$  WT *C. albicans*. Representative results of 3 independent experiments. **a**. Total number of neutrophils per mL of blood of naïve mice on the day of infection (24 hrs after antibody administration) or infected mice 24 hrs post infection (48 hrs after antibody administration) ( $n=6$  mice per group). **b** Flow cytometry graphs (left) and corresponding Ly6G<sup>low</sup>/Ly6G<sup>high</sup> ratios (right) of neutrophils in the spleen and kidneys of infected mice pre-treated with IgG control or anti-SIGNR1 antibodies, 72 hrs post infection and stained for intracellular MPO and surface Ly6G expression (naïve  $n=2$  and infected  $n=3$  mice). **c** Gating strategy for flow cytometric analysis of neutrophils in the spleen and kidneys. **d** Flow cytometry of neutrophils in the spleen and kidneys of WT infected mice 24 hrs, 72 hrs and 5 days post-infection, in an experiment where WT mice started developing symptoms 5 days post-infection. **e** Survival of MPO-deficient mice pre-treated with either control or anti-SIGNR1 antibodies, infected intravenously with either  $1 \times 10^3$  or  $1 \times 10^5$  WT *C. albicans* ( $n=3$  and  $n=5$  mice per group). Statistical analysis by unpaired two-sided Mann-Whitney t-test for single comparison and two-way Log-rank Mantel-Cox test for survival analysis (ns  $>0.05$ , \*  $p < 0.05$ , \*\*  $p < 0.01$ , \*\*\*  $p < 0.001$ , \*\*\*\*  $p < 0.0001$ ).

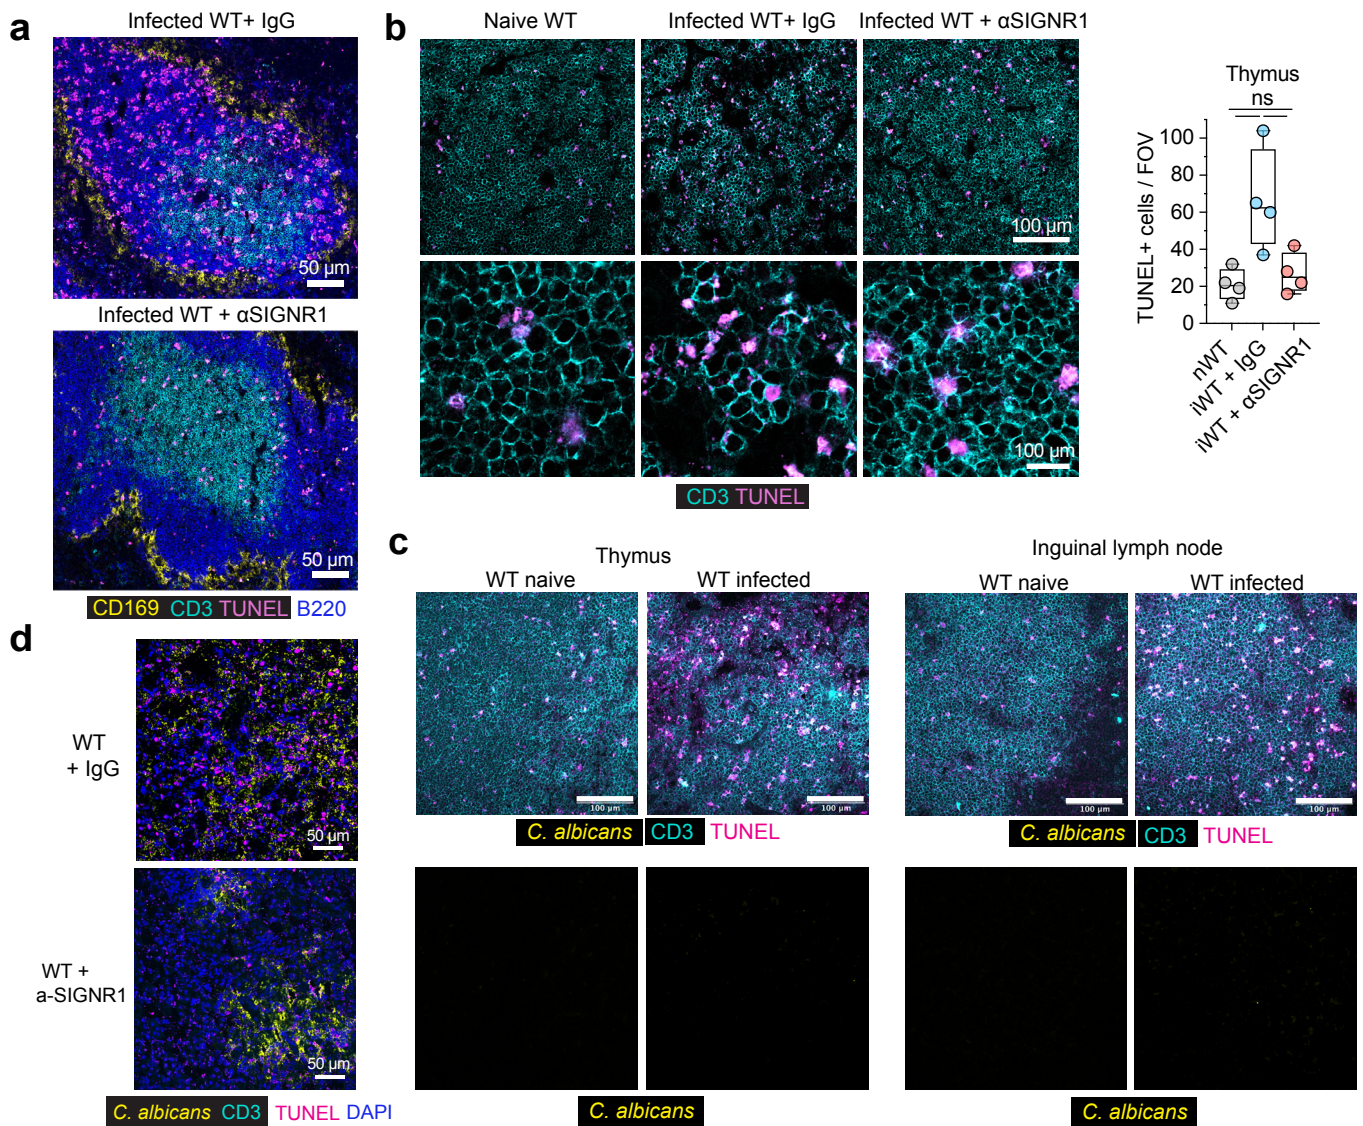

**Supplementary Figure 6. SIGNR1 promotes cell death in the kidneys, thymus and lymph nodes.** **a-d** Naive WT mice or infected with  $5 \times 10^5$  WT *C. albicans* and treated with control IgG or anti-SIGNR1 antibodies, 72 hrs post-infection **a** Immunofluorescence micrographs of spleens stained for apoptotic cells (TUNEL), CD3, CD169 and B220. Representative images of 3 animals per group and 3 independent experiments. Scale bars: 50  $\mu$ m. **b** Immunofluorescence micrographs of the thymus stained for TUNEL and CD3. Quantitation of average TUNEL+ cells per FOV is depicted on the right (n=4 mice per group). Scale bars: 100  $\mu$ m (upper row) and 25  $\mu$ m (lower row). **c** Immunofluorescence confocal micrographs of the thymus and inguinal lymph nodes stained for TUNEL, CD3 and *C. albicans* (n=4 mice per group). Scale bar: 100  $\mu$ m. **d** Immunofluorescence micrographs of kidneys stained for *C. albicans*, CD3, TUNEL, DAPI (n=3 mice per group). Data representative from 3 independent experiments. Scale bar: 50  $\mu$ m. Scale bars: 50  $\mu$ m. Statistical analysis by two-sided unpaired Mann-Whitney t-test (\* p<0.05, \*\* p<0.01, \*\*\* p<0.001, \*\*\*\* p<0.0001).

24 hrs

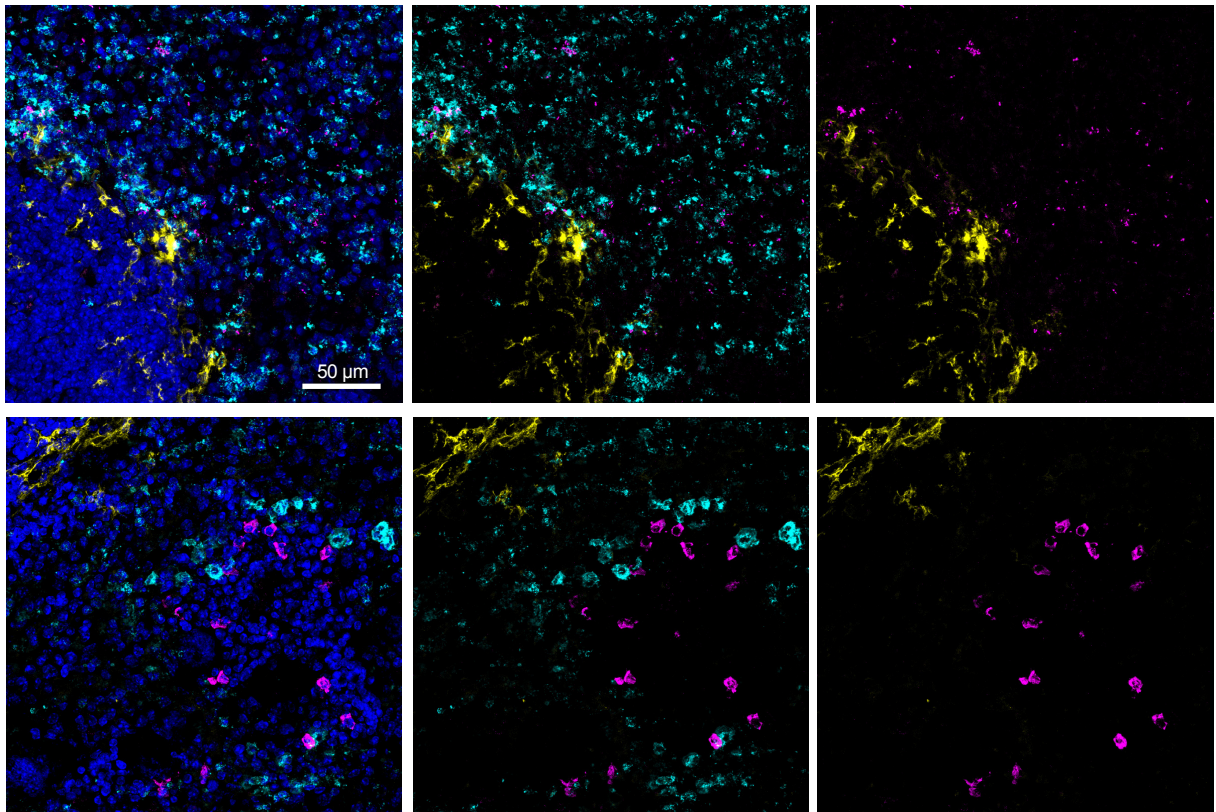

*S. aureus* MPO CD169 DAPI

72 hrs

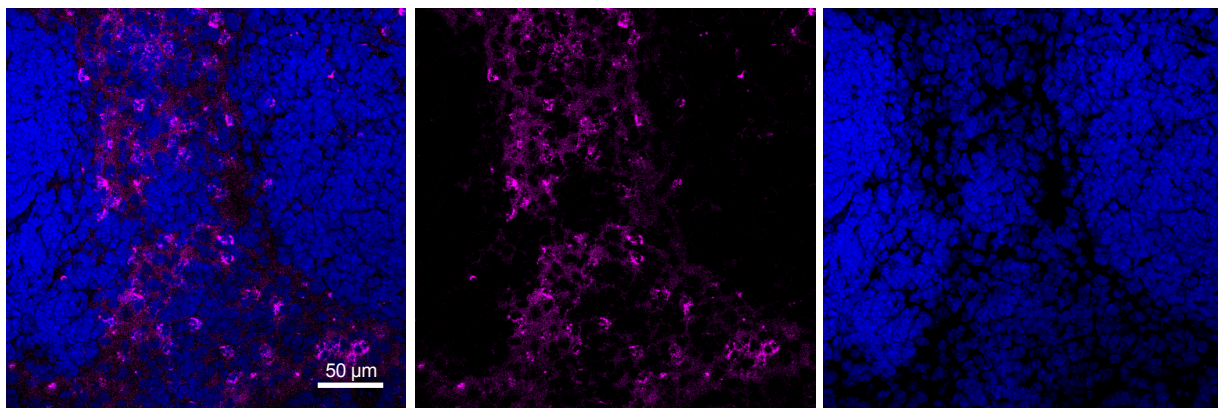

*S. aureus* DAPI

**Supplementary Figure 7. *Staphylococcus aureus* colonization in the spleen.** Representative confocal micrographs of spleens of WT mice infected with  $1 \times 10^6$  WT *S. aureus* 24 hrs (top) and 72 hrs (bottom) post-infection, stained for *S. aureus*, MPO, CD169 and DAPI (n=3 animals per group). Representative of 2 independent experiments. Scale bars, 50  $\mu$ m.

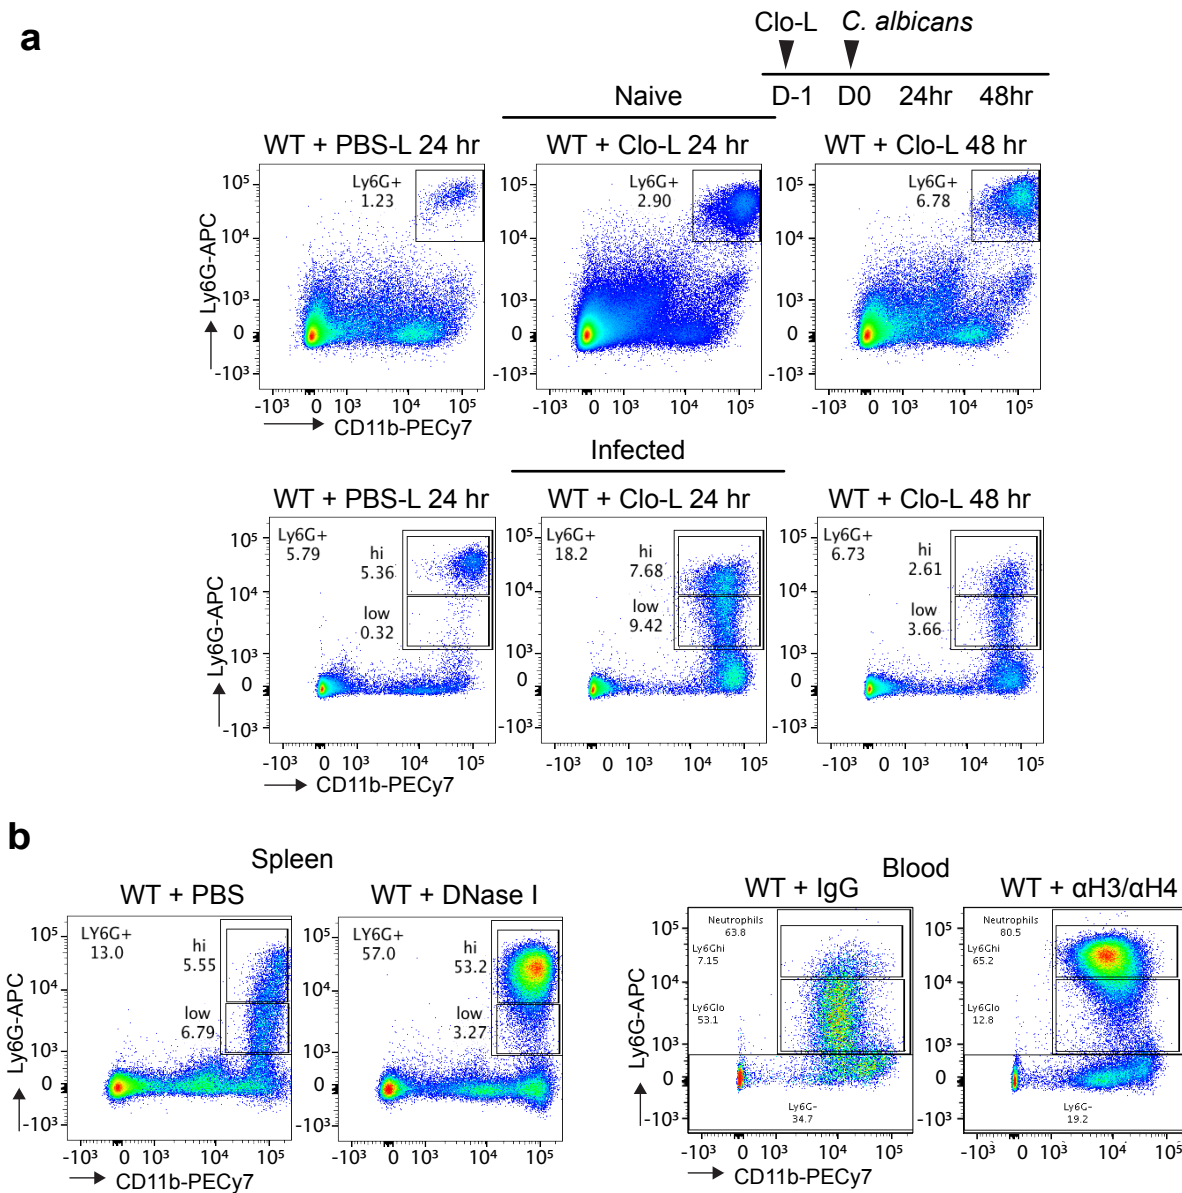

**Supplementary Figure 8. Extracellular chromatin alters neutrophil populations.** **a** Representative flow cytometry graphs depicting Ly6G<sup>low</sup>/Ly6G<sup>high</sup> ratios in the spleens of WT mice pre-treated with PBS-L or Clo-L, either naïve or infected with  $1 \times 10^5$  WT *C. albicans*, 24 hrs and 48 hrs post-infection. **b** Representative flow cytometry graphs depicting Ly6G<sup>low</sup>/Ly6G<sup>high</sup> ratios in the spleen (left) and blood (right) of WT mice pre-treated with either DNase I, PBS, control IgG or anti-H3 and anti-H4 antibodies, infected intravenously with  $5 \times 10^5$  WT *C. albicans*, 3 days post-infection.



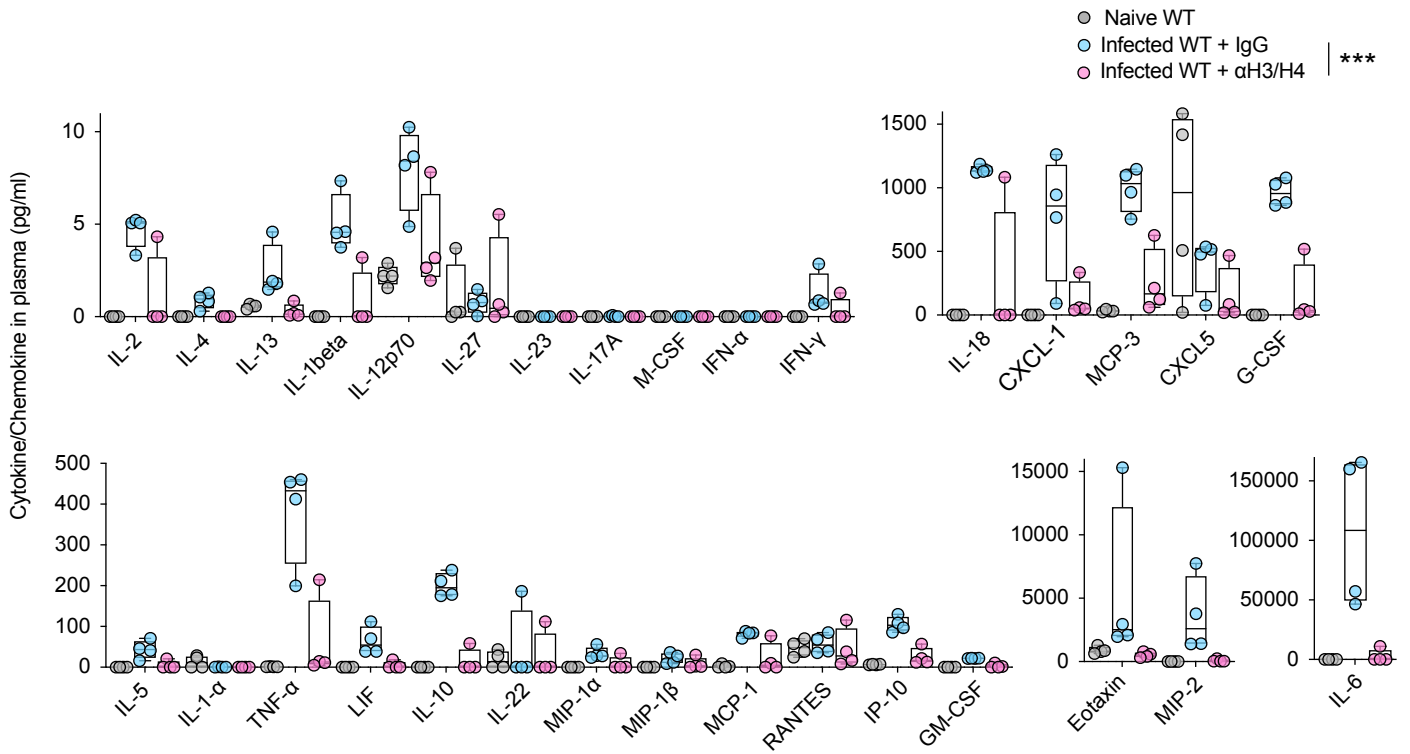

**Supplementary Figure 9. Extracellular chromatin promotes systemic inflammation.** Cytokines and chemokines measured by multiplex immunoassay in the plasma of WT mice either naive or pre-treated with IgG or anti-H3/anti-H4 antibodies and infected with  $5 \times 10^5$  *C. albicans*, 72 hrs post-infection (n=4 mice per group). Statistical analysis by two-way Avova (\* p<0.05, \*\* p<0.01, \*\*\* p<0.001, \*\*\*\* p<0.0001).

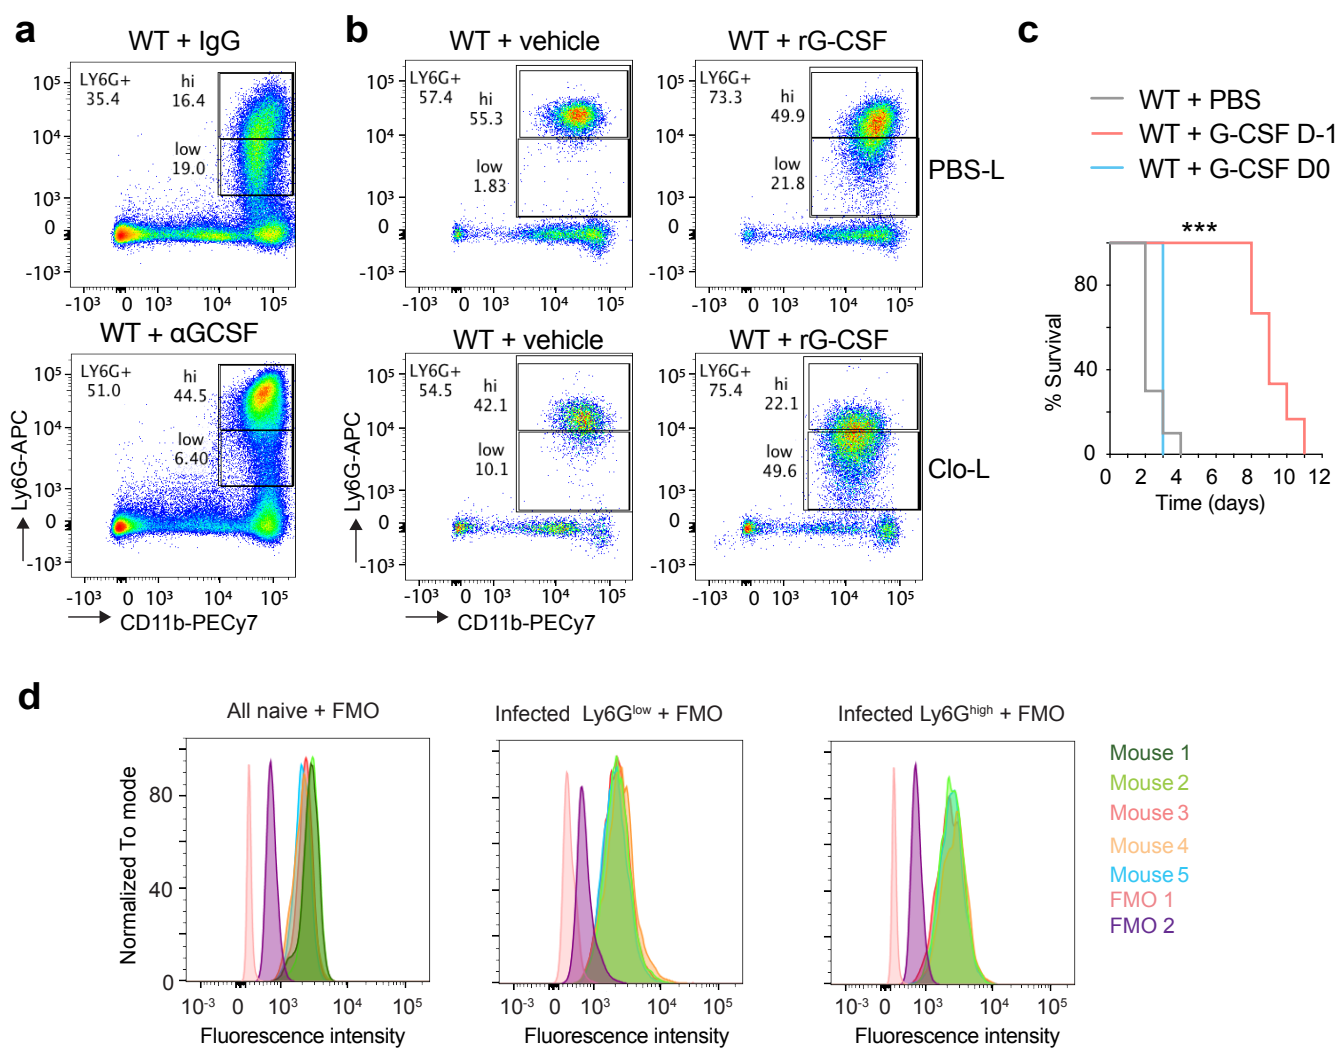

**Supplementary Figure 10. G-CSF and cell death-derived chromatin alter neutrophil populations.**

**a** Representative flow cytometry graphs of Ly6G<sup>low</sup>/Ly6G<sup>high</sup> ratios in the spleens of WT mice infected intravenously with  $5 \times 10^5$  *C. albicans*, treated with control or anti-G-CSF antibody at 24 hrs and 48 hrs post-infection and analysed 72 hrs post-infection. **b** Representative flow cytometry graphs of Ly6G<sup>low</sup>/Ly6G<sup>high</sup> ratios of neutrophils in the spleens of naive mice pre-treated with PBS-L or Clo-L and administered PBS or recombinant G-CSF 24hrs later. Analysis performed 72 hrs after liposome administration. **c** Survival of WT mice pre-treated with PBS or recombinant G-CSF, administered 24 hrs prior to (D-1) or on the day of infection (D0) with  $5 \times 10^5$  WT *C. albicans*. **d** Flow cytometry analysis of G-CSFR surface protein expression in Ly6G<sup>high</sup> neutrophils from naïve WT mice (left panel), or Ly6G<sup>low</sup> (middle panel) and Ly6G<sup>high</sup> (right panel) neutrophils from infected mice 3-4 days post-infection. Ly6G<sup>high</sup> neutrophils of naïve mice stained in the absence of primary and secondary antibodies (FMO1) or with secondary antibody alone (FMO2). Statistical analysis by two-sided Log-rank (Mantel-Cox) test for survival analysis (\* p<0.05, \*\* p<0.01, \*\*\* p<0.001, \*\*\*\* p<0.0001).

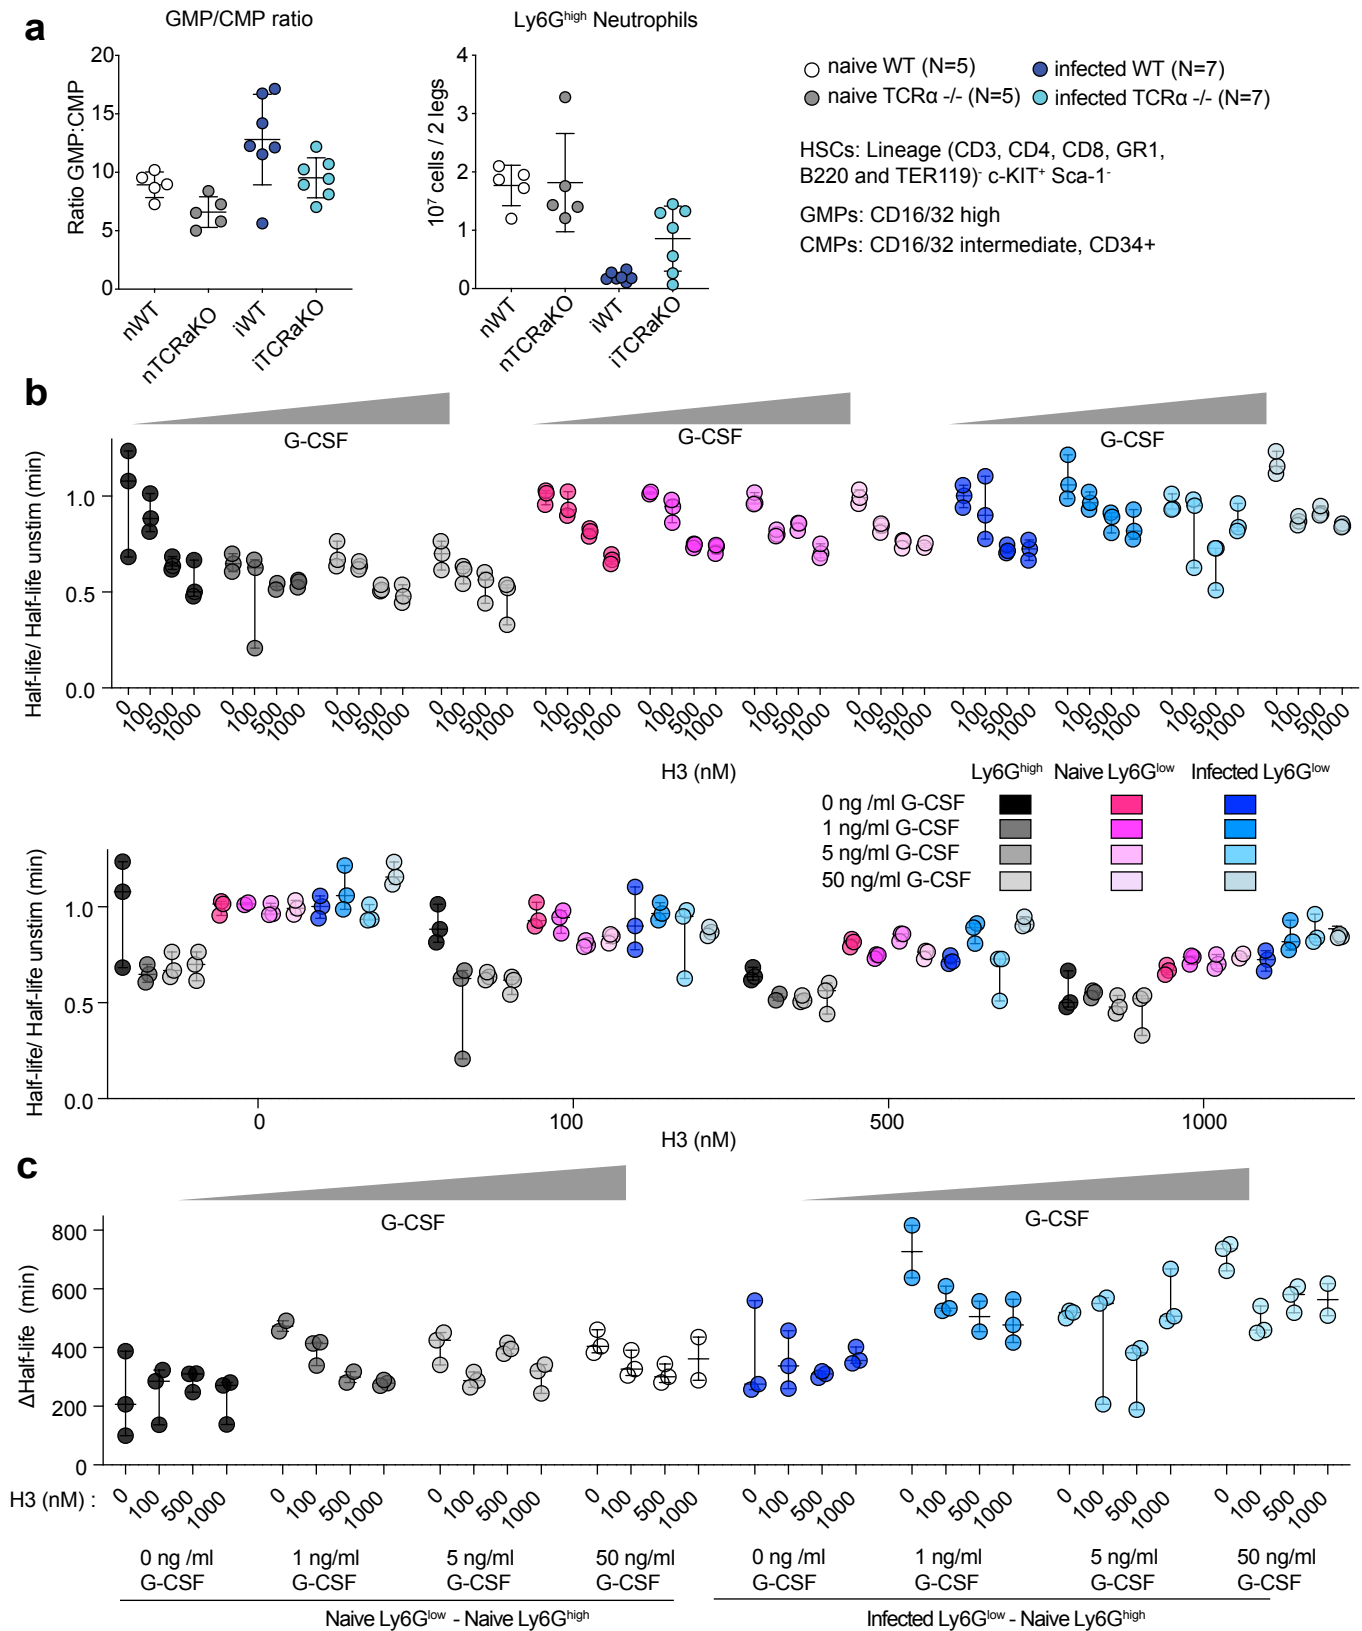

**Supplementary Figure 11. Effect of G-CSF and histones on neutrophil progenitors and neutrophil lifespan.** a Flow cytometry analysis of myelopoietic progenitors and mature Ly6G<sup>high</sup> neutrophils in the bone marrows of naive WT and TCR $\alpha$ -deficient animals or infected intravenously with  $5 \times 10^5$  *C. albicans*. The left panel depicts the ratios of GMPs to CMPs and the right panel the corresponding total Ly6G<sup>high</sup> neutrophils in the bone marrow (naive n=5 and infected n=7 mice per group). b Half-life ratio of Ly6G<sup>high</sup> and Ly6G<sup>low</sup> neutrophils from naive mice or Ly6G<sup>low</sup> neutrophils from infected symptomatic mice supplemented with histone H3 or G-CSF at the indicated concentrations in the color scheme label. Average and SD from 3 FOV per condition. c Difference in the half-life between WT naive Ly6G<sup>high</sup> and Ly6G<sup>low</sup> neutrophils (black and grey shades) or WT naive Ly6G<sup>high</sup> and Ly6G<sup>low</sup> neutrophils from infected symptomatic mice (blue shades) alone or supplemented with histone H3 or G-CSF at the indicated concentrations. Average and SD from 3 FOV per condition. Data are representative of 3 independent experiments.

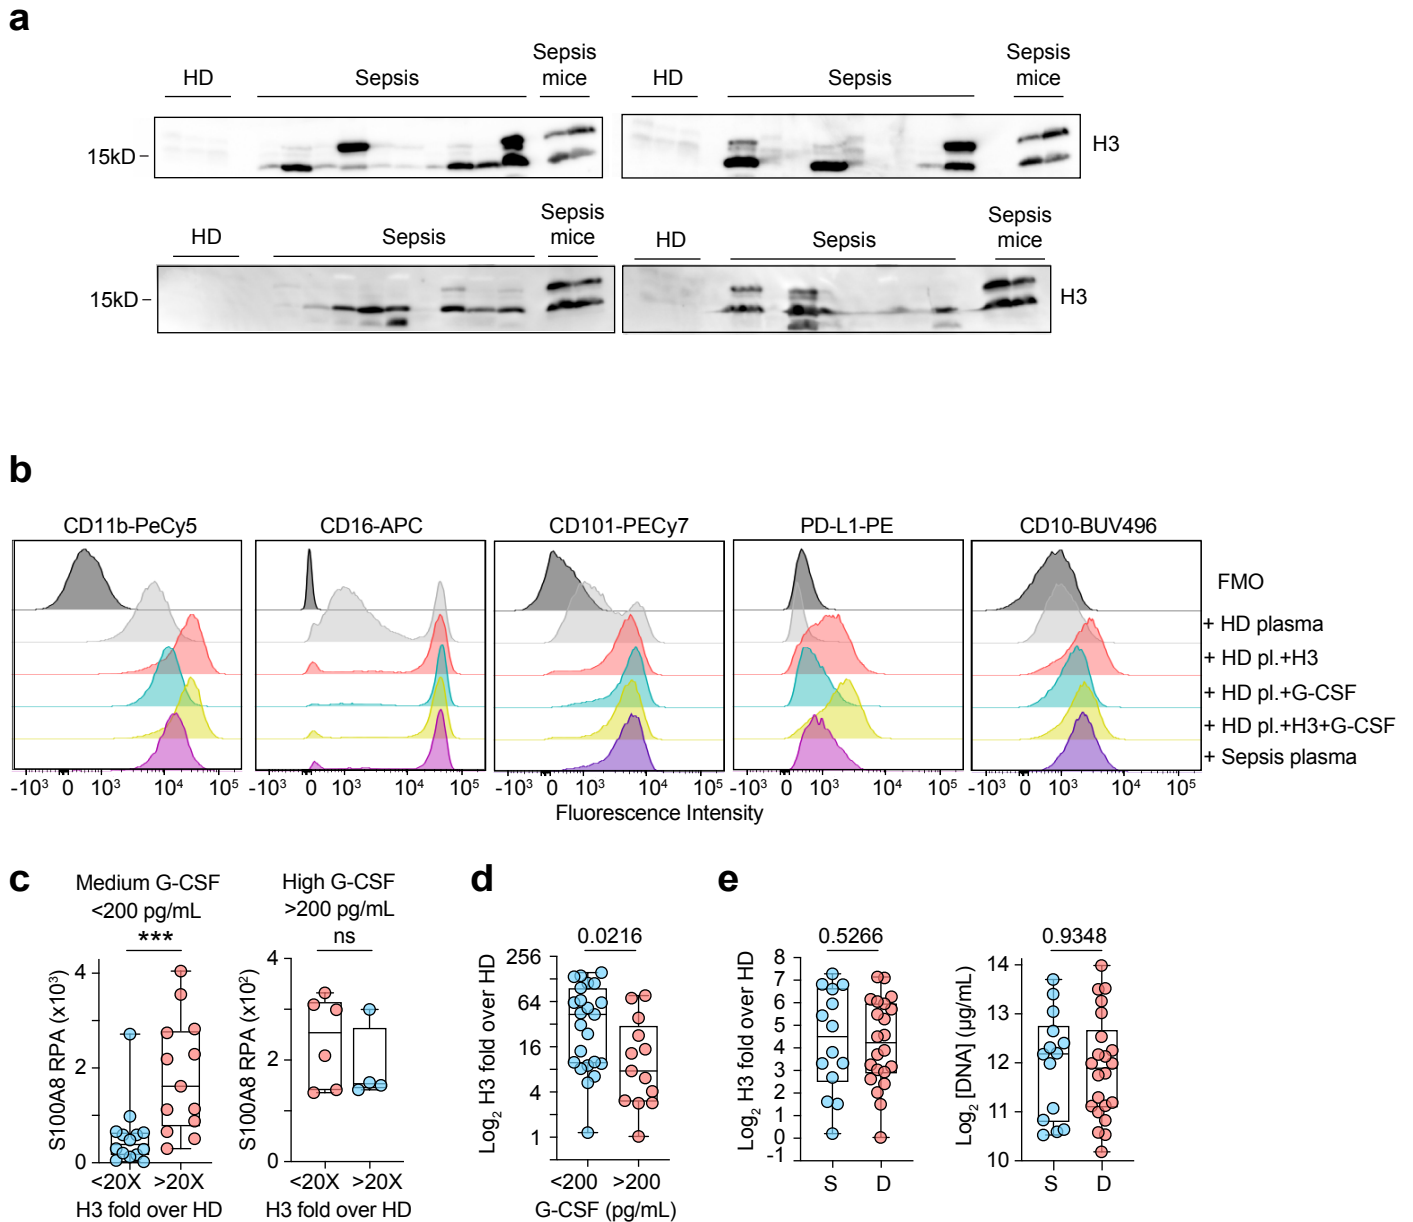

**Supplementary Figure 12. Sepsis patient plasma analysis and impact on neutrophil surface marker expression.** **a** Western immunoblotting for histone H3 in the plasma of healthy donors (HD, n=3) and sepsis patients (n=36). **b** Representative histograms of flow cytometry analysis of surface markers on healthy donor CD15<sup>+</sup>CD66b<sup>+</sup> neutrophils incubated with HD or sepsis patient plasma alone or HD plasma supplemented with histone H3 or G-CSF alone or in combination for 1000 min. Panel: CD11b-PECy5, CD16-APC, CD101-PECy7, PD-L1-PE, CD10-BUV496. **c** Concentration of S100A8 in plasmas containing medium (<200 pg/mL, left panel) or high (>200 pg/mL, right panel) G-CSF levels, grouped based on medium (<20X fold over HD; n=26) or high (>20X fold over HD; n=10 donors) histone H3 plasma concentrations. **d** Histone H3 levels in the plasma of sepsis patients segregated into high and medium G-CSF containing groups. **e** Histone H3 and DNA levels in the plasma of patients that survived (S) or died (D). Statistical analysis by unpaired two-sided parametric t-test (\* p<0.05, \*\* p<0.01, \*\*\* p<0.001, \*\*\*\* p<0.0001).

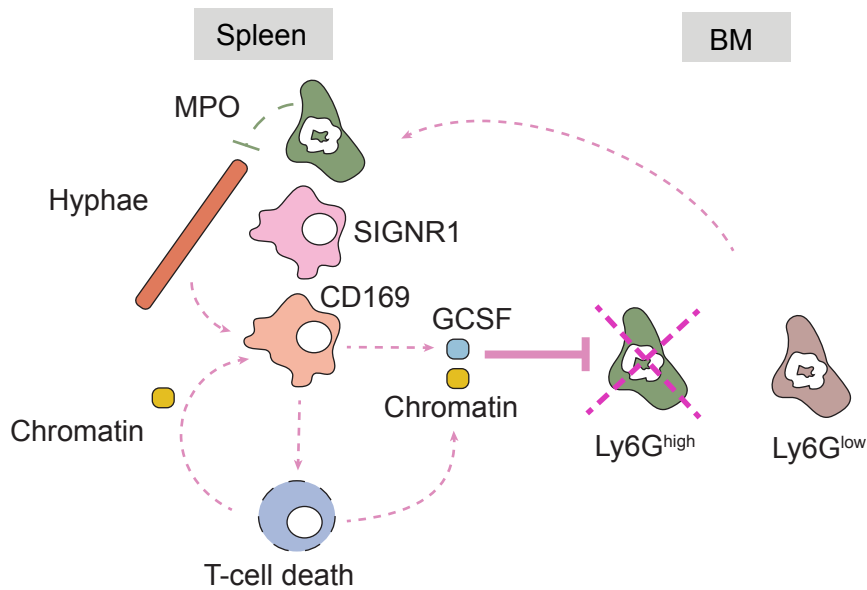

**Supplementary Figure 13. SINGR1-mediated microbe capture promotes hyperinflammation and immune dysfunction.** Schematic representation depicting the pathogenic feedback mechanism that enables pathogens to exploit microbial capture in the spleen, in order to degrade immune defense and trigger sepsis. Neutrophil-derived myeloperoxidase (MPO) controls microbes captured by spleen marginal zone SIGNR1<sup>+</sup> macrophages through the release of MPO-derived oxidants. Microbial infiltration into the inner CD169<sup>+</sup> macrophage layer, triggers T cell death and the release of extracellular chromatin in a T cell dependent manner. Synergistic activation of CD169 macrophages by histone and fungal hyphae induces G-CSF alongside other cytokines. G-CSF and histones progressively eliminate mature Ly6G<sup>high</sup> neutrophils by selectively shortening their lifespan, leading to a prevalence of immature Ly6G<sup>low</sup> neutrophils with defective ROS production that are unable to control hyphal growth in the spleen and other organs. This feedback loop promotes immune dysfunction in both the innate and the adaptive immune compartments, leading to hyperinflammation, immune deficiency and sepsis.

Supplementary Table 1. Antibody list

| Application                  | Target species   | Target protein                 | Fluorophore/label |
|------------------------------|------------------|--------------------------------|-------------------|
| FACS Neutrophil panel        | Mouse            | CD3                            | PerCP-Cy5.5       |
| FACS Neutrophil panel        | Mouse            | CD19                           | PerCP-Cy5.5       |
| FACS Neutrophil panel        | Mouse            | CD11b                          | PE-Cy7            |
| FACS Neutrophil panel        | Mouse            | Ly6G                           | APC               |
| FACS Neutrophil panel        | Mouse            | Ly6C                           | BV711             |
| FACS Neutrophil panel        | Mouse            | G-CSFR                         | Unconjugated      |
| FACS Neutrophil panel        | Rat              | IgG                            | AF488             |
| FACS Neutrophil panel        | Mouse            | MPO                            | FITC              |
| FACS HSC panel               | Mouse            | CD3                            | Biotin            |
| FACS HSC panel               | Mouse            | CD4                            | Biotin            |
| FACS HSC panel               | Mouse            | CD8                            | Biotin            |
| FACS HSC panel               | Mouse            | Gr-1                           | Biotin            |
| FACS HSC panel               | Mouse            | B220                           | Biotin            |
| FACS HSC panel               | Mouse            | TER119                         | Biotin            |
| FACS HSC panel               | Mouse            | c-KIT                          | BV711             |
| FACS HSC panel               | Mouse            | Sca-1                          | BUV395            |
| FACS HSC panel               | Mouse            | CD16/32                        | PE                |
| FACS HSC panel               | Mouse            | CD34                           | FITC              |
| FACS Neutrophil panel        | Human            | CD10                           | BUV496            |
| FACS Neutrophil panel        | Human            | CD11b                          | PE-Cy5            |
| FACS Neutrophil panel        | Human            | CD15                           | BV510             |
| FACS Neutrophil panel        | Human            | CD16                           | APC               |
| FACS Neutrophil panel        | Human            | CD66b                          | FITC              |
| FACS Neutrophil panel        | Human            | CD101                          | PE-Cy7            |
| FACS Neutrophil panel        | Human            | PD-L1                          | PE                |
| IHC primary antibody         | Mouse            | B220                           | BV421             |
| IHC primary antibody         | <i>Candida</i>   | recognizes various proteins in | Unconjugated      |
| IHC primary antibody         | Mouse            | CD3                            | AF488             |
| IHC primary antibody         | Mouse            | CD4                            | AF488             |
| IHC primary antibody         | Mouse            | CD169                          | AF647             |
| IHC primary antibody         | Mouse            | F4/80                          | Unconjugated      |
| IHC primary antibody         | Mouse            | Ly6G                           | AF647             |
| IHC primary antibody         | Mouse            | MARCO                          | Unconjugated      |
| IHC primary antibody         | Mouse            | MPO                            | Unconjugated      |
| IHC primary antibody         | Mouse            | SIGNR1                         | AF488             |
| IHC primary antibody         | Mouse            | SIGNR1                         | Biotin            |
| IHC primary antibody         | Mouse            | TCR- $\beta$                   | FITC              |
| IHC primary antibody         | -                | MDA                            | Unconjugated      |
| IHC primary antibody         | Mouse            | cleaved-caspase3               | Unconjugated      |
| IHC primary antibody         | Mouse            | cleaved-caspase8               | Unconjugated      |
| IHC primary antibody         | <i>S. aureus</i> | -                              | Unconjugated      |
| IHC secondary antibody       | Rabbit           | IgG                            | AF488/AF568/AF647 |
| IHC secondary antibody       | Goat             | IgG                            | AF488/AF568/AF648 |
| IHC secondary antibody       | Rat              | IgG                            | AF488/AF568/AF649 |
| In vivo Neu depletion        | Mouse            | Ly6G                           | Unconjugated      |
| In vivo Neu depletion        | -                | IgG2a $\kappa$ isotype control | Unconjugated      |
| In vivo SIGNR1-block         | Mouse            | SIGNR1                         | Unconjugated      |
| In vivo SIGNR1-block         | -                | IgG isotype control            | Unconjugated      |
| In vivo G-CSF neutralization | Mouse            | G-CSF                          | Unconjugated      |

|                                |          |                            |              |
|--------------------------------|----------|----------------------------|--------------|
| In vivo G-CSF neutralization   | -        | IgG2a κ isotype control    | Unconjugated |
| In vivo histone neutralization | Multiple | Histone H3                 | Unconjugated |
| In vivo histone neutralization | Multiple | Histone H4                 | Unconjugated |
| In vivo histone neutralization | -        | rabbit IgG isotype control | Unconjugated |
| In vitro H3 neutralization     | Human    | Histone H3                 | Unconjugated |
| In vitro G-CSF neutralization  | Human    | G-CSF                      | Unconjugated |

| Clone      | Dilution | Manufacturer            | Catalogue number     |
|------------|----------|-------------------------|----------------------|
| 17A2       | 1:200    | BioLegend               | 100218               |
| 6D5        | 1:200    | BioLegend               | 115534               |
| M1/70      | 1:500    | BioLegend               | 101216               |
| 1A8        | 1:200    | BioLegend               | 127614               |
| HK1.4      | 1:500    | BioLegend               | 128037               |
| 680206     | 1:50     | R&D                     | MAB6039              |
| Polyclonal | 1:100    | Invitrogen              | A21208               |
| 8F4        | 1:50     | Hycult Biotech          | HM1051F-100UG        |
| 145-2C11   | 1:50     | BioLegend               | 100304               |
| RM4-5      | 1:50     | BioLegend               | 100406               |
| 53-6.7     | 1:50     | BioLegend               | 100704               |
| RB6-8C5    | 1:50     | BioLegend               | 108404               |
| RA3-6B2    | 1:50     | BioLegend               | 103204               |
| TER-119    | 1:50     | BioLegend               | 116204               |
| 2B8        | 1:100    | BD horizon              | 563160               |
| D7         | 1:100    | BD Biosciences          | 566216               |
| 2.4G2      | 1:100    | BD biosciences          | 553145               |
| RAM34      | 1:100    | BD Biosciences          | 560238               |
| HI10a      | 1:100    | BD Bioscience           | 741137               |
| M1/70      | 1:200    | BioLegend               | 101210               |
| W6D3       | 1:200    | BD Biosciences          | 563141               |
| 3G8        | 1:200    | BD Biosciences          | 561248               |
| G10F5      | 1:200    | BioLegend               | 305103               |
| BB27       | 1:200    | BioLegend               | 331014               |
| MIH3       | 1:100    | BioLegend               | 374512               |
| RA3-6B2    | 1:50     | BioLegend               | 103239               |
| Polyclonal | 1:1000   | Acris                   | BP1006               |
| 17A2       | 1:100    | BioLegend               | 100210               |
| GK1.5      | 1:100    | BioLegend               | 100423               |
| 3D6.112    | 1:100    | BioLegend               | 142408               |
| A3-1       | 1:100    | Abcam                   | ab6640               |
| 1A8        | 1:50     | BioLegend               | 127610               |
| ED31       | 1:50     | BMA Biomedicals         | T-2026               |
| Polyclonal | 1:40     | R&D Systems             | AF3667               |
| eBio22D1   | 1:100    | eBioscience             | 53-2093-82           |
| ER-TR9     | 1:50     | Abcam                   | ab51819              |
| H57-597    | 1:100    | Invitrogen              | 11-5961-82           |
| Polyclonal | 1:500    | Abcam                   | ab6463               |
| -          | 1:400    | Cell Signaling          | 9661                 |
| -          | 1:800    | Cell Signaling          | 8592                 |
| Polyclonal | 1:800    | ThermoFisher Scientific | PA1-7246             |
| Polyclonal | 1:200    | Invitrogen              | A21206/A10042/A31573 |
| Polyclonal | 1:200    | Invitrogen              | A11055/A11057/A21447 |
| Polyclonal | 1:200    | Invitrogen              | A21208/A11077/A21247 |
| 1A8        | -        | BioXCell                | BE0075-1             |
| 2A3        | -        | BioXCell                | BE0089               |
| 22D1       | -        | BioXCell                | BE0220               |
| Polyclonal | -        | BioXCell                | BE0091               |
| 9B4CSF     | -        | Invitrogen eBioscience  | 16-7353-85           |



|               |   |                 |          |
|---------------|---|-----------------|----------|
| 2A3           | - | BioXCell        | BE0089   |
| Polyclonal    | - | Merck Millipore | 07-690   |
| 62-141-13     | - | Merck Millipore | 04-858   |
| Polyclonal    | - | BioXCell        | BE0095   |
| Polyclonal    | - | Millipore       | 06-755   |
| EPR3203(N)(B) | - | Abcam           | ab181053 |
